# **Mendelian randomization does not support serum calcium in prostate cancer risk**

(Short running head: Mendelian randomization: calcium & prostate cancer)

James Yarmolinsky<sup>1,2</sup>, Katie Berryman<sup>1,2</sup>, Ryan Langdon<sup>1,2</sup>, Carolina Bonilla<sup>1,2,3</sup>, the PRACTICAL consortium\*, George Davey Smith<sup>1,2,4</sup>, Richard M Martin<sup>1,2,4</sup>, Sarah J Lewis<sup>1,2</sup>

<sup>1</sup> MRC Integrative Epidemiology Unit, University of Bristol, Bristol, UK

<sup>2</sup> Population Health Sciences, Bristol Medical School, University of Bristol, Bristol, UK

<sup>3</sup> Department of Preventive Medicine, School of Medicine, University of São Paulo, São Paulo, Brazil

<sup>4</sup> National Institute for Health Research (NIHR) Bristol Biomedical Research Centre, University Hospitals Bristol NHS Foundation Trust and the University of Bristol, Bristol

\* Members from the Prostate Cancer Association Group to Investigate Cancer Associated Alterations in the Genome (PRACTICAL) consortium are provided in the Supplement notes. Information of the consortium can be found at <http://practical.icr.ac.uk/>.

**Authors' surnames:** Yarmolinsky, Berryman, Langdon, Bonilla, Davey Smith, Martin, Lewis

The funders played no role in the design, implementation, analysis, or interpretation of the data in this study.

**Corresponding author:**

Sarah J Lewis

MRC Integrative Epidemiology Unit,

School of Social and Community Medicine,

University of Bristol, Oakfield House, Oakfield Grove,

Bristol BS8 2BN, UK.

Phone: +44 (0) 117 33 13316

E-mail: S.J.Lewis@bristol.ac.uk

**Funding:** This research was funded by a grant awarded to SJL for 3 years to identify modifiable risk factors for prostate cancer, by the World Cancer Research Fund International (grant reference number: 2015/1421). JY and RL are supported by Cancer Research UK (C18281/A19169) programme grant (the Integrative Cancer Epidemiology Programme Cancer Research UK Research PhD studentships (C18281/A20988 to JY and RL). RMM is also supported by the National Institute for Health Research (NIHR) Bristol Biomedical Research Centre. All authors are further supported by a Cancer Research UK (C18281/A19169) programme grant (the Integrative Cancer Epidemiology Programme) and are part of the Medical Research Council Integrative Epidemiology Unit at the University of Bristol supported by the Medical Research Council (MC\_UU\_12013/1, MC\_UU\_12013/2, and MC\_UU\_12013/3) and the University of Bristol.

**Author-defined abbreviations:** GWAS, genome-wide association study; HR, Hazard Ratio; InSIDE, Instrument Strength Independent of Direct Effect; IV, instrumental variable; MR, Mendelian randomization; OR, Odds Ratio; PRACTICAL, Prostate Cancer Association

Group to Investigate Cancer Associated Alterations in the Genome; RR, Risk Ratio; SNPs, single nucleotide polymorphisms; WME, weighted median estimator

# 1 Abstract

2 **Background:** Observational studies suggest that dietary and serum calcium are risk factors  
3 for prostate cancer. However, such studies suffer from residual confounding (due to  
4 unmeasured or imprecisely measured confounders), undermining causal inference. Mendelian  
5 randomization uses randomly assigned (hence unconfounded and pre-disease onset) germline  
6 genetic variation to proxy for phenotypes and strengthen causal inference in observational  
7 studies.

8 **Objective:** We tested the hypothesis that serum calcium is associated with an increased risk  
9 of overall and advanced prostate cancer.

10 **Design:** A genetic instrument was constructed using 5 single nucleotide polymorphisms  
11 robustly associated with serum calcium in a genome-wide association study ( $N \leq 61,079$ ).  
12 This instrument was then used to test the effect of a 0.5 mg/dL increase (1 standard deviation,  
13 SD) in serum calcium on risk of prostate cancer in 72,729 men in the PRACTICAL (Prostate  
14 Cancer Association Group to Investigate Cancer Associated Alterations in the Genome)  
15 Consortium (44,825 cases, 27,904 controls) and risk of advanced prostate cancer in 33,498  
16 men (6,263 cases, 27,235 controls).

17 **Results:** We found weak evidence for a protective effect of serum calcium on prostate cancer  
18 risk (odds ratio [OR] per 0.5 mg/dL increase in calcium: 0.83, 95% CI: 0.63-1.08;  $P=0.12$ ).  
19 We did not find strong evidence for an effect of serum calcium on advanced prostate cancer  
20 (OR per 0.5 mg/dL increase in calcium: 0.98, 95% CI: 0.57-1.70;  $P=0.93$ ).

21 **Conclusions:** Our Mendelian randomization analysis does not support the hypothesis that  
22 serum calcium increases risk of overall or advanced prostate cancer.

23

24     **Keywords:** diet; nutrition; calcium; prostate cancer; advanced prostate cancer; Mendelian

25     randomization

26

27

28

29

30

31

32

33

34

35

36

37

38

39

40

41

42

43

## 44 **Background**

45 Prostate cancer is the most frequently diagnosed cancer among men globally and is a  
46 common cause of male cancer death [1]. Despite the considerable global burden attributed to  
47 prostate cancer, to date few risk factors (advanced age, ethnicity, family history of prostate  
48 cancer) have been identified and no modifiable risk factors have been established for this  
49 condition [2]. Nonetheless, global variation in prostate cancer mortality [3, 4] and findings  
50 from migration studies (i.e, the convergence toward local prostate cancer mortality rates  
51 among men who migrate from non-Western to Western populations) [5-7], provide support  
52 for a role of modifiable risk in prostate carcinogenesis.

53 Dietary calcium intake has been associated with an increased risk of prostate cancer in  
54 prospective epidemiological studies [8-10]. In a meta-analysis of fifteen prospective studies,  
55 high dietary calcium intake, as compared to low intake, was associated with an 18% (95% CI:  
56 8-30%) increased prostate cancer risk [11]. Similarly, high calcium intake has been linked to  
57 an increased risk of advanced [12-14] and fatal prostate cancer [13], though findings have  
58 been inconsistent [15, 16]. Though serum calcium is normally tightly regulated in the body  
59 and does not fluctuate substantially across levels of dietary calcium intake [17, 18],  
60 Giovannucci proposed that higher dietary calcium may influence risk of prostate cancer by  
61 lowering circulating levels of 1,25(OH)<sub>2</sub> vitamin D, a presumed tumour suppressor, [19-21]  
62 in order to achieve calcium homeostasis [22]. A more direct method of testing the hypothesis  
63 that calcium metabolism influences prostate carcinogenesis would be to examine the  
64 association of serum calcium levels with prostate cancer risk. However, studies examining  
65 the association of pre-diagnostic serum calcium levels with incident or fatal prostate cancer  
66 [23, 24], or post-diagnostic serum calcium with prostate cancer survival [25, 26], have  
67 generated conflicting results: some report positive associations of serum calcium with

68 prostate cancer [23, 26, 27] whereas others have been compatible with a null effect [23-25,  
69 28, 29]).

70 Establishing a causal role of elevated serum calcium in prostate carcinogenesis could  
71 have therapeutic implications for the prevention or treatment of prostate cancer. However,  
72 obtaining reliable estimates of causal effects from observational studies is a challenge as  
73 these studies are prone to various biases including residual confounding (due to unmeasured  
74 or imprecisely measured confounders) and exposure measurement error which can undermine  
75 robust causal inference [30, 31].

76 Mendelian randomization (MR) is an analytical approach that uses randomly assigned  
77 (hence unconfounded and pre-disease) germline genetic variants as instruments (i.e., proxies  
78 for the risk factor of interest) to examine the causal effects of risk factors on health outcomes  
79 [32, 33]. MR is a form of instrumental variable (IV) analysis that allows for unbiased causal  
80 effects to be estimated if three assumptions are met: 1) the instrument (e.g., a single germline  
81 genetic variant or a multi-allelic score) is robustly associated with the exposure of interest; 2)  
82 the instrument is not associated with any confounding factor(s) that would otherwise distort  
83 the association between the exposure and outcome; and 3) there is no pathway through which  
84 an instrument influences an outcome except through the exposure (known as the “exclusion  
85 restriction criterion”). The random allocation of genetic variants at conception and the  
86 independent assortment of parental alleles at meiosis means that, at a population level,  
87 analyses using genetic variants as instruments for a risk factor of interest should not be  
88 confounded by environmental and lifestyle factors that typically distort observational studies.

89 The availability of germline genetic variants (SNPs – single nucleotide  
90 polymorphisms) robustly associated with serum calcium and prostate cancer in separate and  
91 independent genome-wide association studies (GWAS) [34, 35] can permit examination of

the causal effect of increased serum calcium on prostate cancer risk using a “two-sample Mendelian randomization” framework [36]. Such an approach provides an efficient and statistically robust method of appraising causal relationships between traits, bypassing the need to have access to complete phenotypic and genotypic data on all participants in one sample.

Given uncertainty surrounding the role of serum calcium in prostate cancer aetiology and progression, we used data from: i) a GWAS of serum calcium in up to 61,079 individuals of European descent; and ii) a GWAS of prostate cancer in men of European descent (N=72,729). These samples were used to perform a two-sample Mendelian randomization analysis to examine the causal effect of elevated serum calcium with risk of overall and advanced prostate cancer

## Methods

### *Prostate cancer population*

We obtained summary genome-wide association study (GWAS) statistics from analyses on 44,825 men with prostate cancer and 27,904 control men of European descent from 108 studies in the Prostate Cancer Association Group to Investigate Cancer Associated Alterations in the Genome (PRACTICAL) consortium [35]. Summary statistics were also obtained from analyses on 6,263 men with advanced prostate cancer (defined as Gleason score  $\geq 8$ , prostate-specific antigen  $>100$  ng/mL, metastatic disease (M1), or death from prostate cancer) and 27,235 controls. All studies in PRACTICAL have the relevant Institutional Review Board approval from each country, in accordance with the Declaration of Helsinki. Genotype data were obtained by either direct genotyping using an Illumina Custom Infinium array (OncoArray) consisting of approximately 530,000 SNPs [37] or by



imputation with reference to the 1000 Genomes Project Phase Three dataset [38]. All SNPs with a poor imputation quality ( $r^2 < 0.30$ ), a minor allele frequency of  $< 1\%$ , a call rate of  $< 98\%$ , or evidence of violation of Hardy-Weinberg equilibrium ( $P < 10^{-7}$  in controls or  $P < 10^{-12}$  in cases) were removed. Analyses were performed across individual studies in PRACTICAL using logistic regression in models that were adjusted for the first seven principal components of ancestry (to control for population stratification) and study relevant covariates. Results were meta-analyzed across the PRACTICAL studies using an inverse-variance fixed-effects approach to give an overall effect-estimate.

#### *Calcium-associated SNP selection*

SNPs to proxy for serum calcium were obtained from a GWAS meta-analysis of 39,400 individuals of European descent from 17 population-based cohorts [34]. Genetic instruments were constructed by obtaining SNPs shown to robustly ( $P < 1 \times 10^{-7}$ ) and independently to associate ( $r^2 < 0.01$ ) with serum calcium levels that were replicated (one-sided  $P < 0.05$ ) in an independent meta-analysis of up to 21,679 individuals of European descent. In total, 7 SNPs located in or near *CASR* (rs1801725), *DGKD* (rs1550532), *GCKR* (rs780094), *GATA3* (rs10491003), *CARS* (rs7481584), *DGKH* (rs7336933), and *CYP24A1* (rs1570669) were independently replicated. Summary data on rs1801725 were not available in the PRACTICAL OncoArray analysis so we used a proxy SNP located in *CASR* (rs17251221) in high linkage disequilibrium with rs1801725 ( $r^2 = 0.85$ ), using the 1000 Genomes Project CEU database as a reference [39]. As an initial test for horizontal pleiotropy (a single locus influencing multiple phenotypes through independent biological pathways; a violation of the “exclusion restriction criterion”), we examined associations of calcium SNPs with thousands of other traits in a large catalogue of summary genetic association statistics

from previously published GWAS (MR-Base; [www.mrbase.org](http://www.mrbase.org)) [40]. After applying a Bonferroni correction to account for multiple “look ups” of phenotypic traits with all 7 SNPs examined ( $P < 0.05/x$ , where  $x$  represents the number of phenotypic trait “look ups” performed; 859 to 1060 look-ups performed with corresponding corrected  $P$ -value thresholds:  $5.8 \times 10^{-5}$  to  $4.7 \times 10^{-5}$  across 7 SNPs), we identified two SNPs (rs780094, rs1550532) that associated with multiple traits in MR-Base. rs780094 was robustly associated ( $P < 4.8 \times 10^{-5}$ ) with various measures of lipids, insulin, and anthropometric traits and rs1550532 was robustly associated ( $P < 4.8 \times 10^{-5}$ ) with inflammatory bowel disease; these traits have all been hypothesized to influence prostate cancer risk [41-44]. Additionally, rs1550532 was strongly associated with levels of multiple “unknown metabolites” from untargeted GWAS of metabolomic studies [45]. Given that these two SNPs could influence prostate cancer risk through biological pathways independent of calcium (i.e. horizontal pleiotropy), we removed them from our genetic instrument. Consequently, our genetic instrument for calcium used five SNPs that we assessed as being exclusively associated with serum calcium (rs17251221, rs10491003, rs7481584, rs7336933, rs1570669).

### *Statistical analysis*

We generated estimates of the proportion of variance in serum calcium for our genetic instrument ( $R^2$ ) and F-statistics to examine the strength of our instruments and to test for weak instrument bias (a reduction in statistical power to reject the null hypothesis when an instrument explains only a small proportion of variance in an exposure), using methods previously described [46]. Power calculations were performed using previously reported methods [47] to determine whether we had sufficient sample size to identify effect sizes in

our MR analyses that were of a similar magnitude to those reported in the observational literature.

We first examined the effect of serum calcium on overall and advanced prostate cancer for individual SNPs, using the Wald ratio to generate beta-coefficients, and the delta method approximation of the standard error. SNPs were then combined into a multi-allelic genetic instrument (to increase the variance explained in serum calcium) and the causal effect of this instrument on overall and advanced prostate cancer was examined using a maximum likelihood-based approach [48]. For both individual-SNP and multi-allelic instrument analyses, the effect of serum calcium on prostate cancer was scaled to represent a 0.5 mg/dL increase ( $\sim 1$  SD).  $I^2$  statistics were calculated to determine the percentage of heterogeneity across SNPs in causal estimates due to variability beyond chance and Cochran's Q test was used to test homogeneity across SNPs in causal estimates [49]. Maximum-likelihood estimates were then generated using fixed-effects or random-effects models depending on heterogeneity of causal effect estimates across SNPs in multi-allelic instruments.  $P$ -values were generated using a t-distribution with  $N-1$  degrees of freedom where  $N$  is the number of SNPs utilized in the instrument.

To examine the presence of directional pleiotropy (where the horizontally pleiotropic effect across a genetic instrument do not average to zero) from unmeasured traits we performed two sensitivity analyses: MR-Egger regression [50] and the weighted median estimator approach [51]. MR-Egger relaxes the exclusion restriction criterion and thus can provide unbiased estimates of causal effects even when all IVs in an instrument are invalid through violation of this assumption. This approach performs a weighted generalized linear regression of the SNP-outcome coefficients on the SNP-exposure coefficients with an unconstrained intercept term. Provided that the InSIDE (Instrument Strength Independent of Direct Effect) assumption is met (that no association exists between the strength of gene-

exposure associations and the strength of bias due to horizontal pleiotropy) and that measurement error in the genetic instrument is negligible (“No Measurement Error” or NOME assumption) [52], the slope generated from MR-Egger regression can provide an estimate of the causal effect of calcium on prostate cancer that is adjusted for directional pleiotropy and the intercept term can provide a formal statistical test for directional pleiotropy. To test NOME, we generated weighted  $I^2_{GX}$  values for overall and advanced prostate cancer analyses to quantify the expected dilution of MR-Egger estimates due to NOME violations [52]. The weighted median estimator (WME) approach provides an estimate of the weighted median of a distribution in which individual IV causal estimates in an instrument are ordered and weighted by the inverse of their variance. Unlike MR-Egger which can provide an unbiased causal effect even when all IVs are invalid, WME requires that at least 50% of the information in a multi-allelic instrument is coming from SNPs that are valid IVs in order to provide an unbiased estimate of a causal effect in an MR analysis. However, the WME has two advantages over MR-Egger in that it provides improved precision as compared to the latter and does not rely on the InSIDE assumption.

We also performed a leave-one-out permutation analysis to examine whether any of our results were driven by any individual SNP from our multi-allelic instrument.

All statistical analyses were performed using R version 3.3.1.

## Results

Our genetic instrument explained 0.71% of variance in serum calcium levels. The corresponding F-statistic for our instrument (86.2) suggested that our instrument was unlikely to suffer from weak instrument bias [53]. Power calculations suggested that we would have 80% power to detect an OR of at least 1.25 (or, conversely a protective OR of at least 0.80)

per 0.5 mg/dL increase in serum calcium on overall prostate cancer risk at an alpha level (false positive) of 5%. For advanced prostate cancer, we had 80% power to detect an OR of at least 1.81 (or a protective OR at least 0.55), which would be of similar magnitude to effect estimates reported in the largest observational study of fatal prostate cancer to date (HR [Hazard Ratio] 1.66 per 0.5 mg/dL increase in serum calcium) [26].

Estimates of causal effects of individual calcium SNPs per 0.5 mg/dL increase in serum calcium on overall and advanced prostate cancer per are presented in Table 1. Individually, there was little evidence that any of the 5 SNPs were causally associated with overall or advanced prostate cancer.

### *Overall prostate cancer*

In an MR analysis combining the five serum calcium-related SNPs into a multi-allelic genetic instrument, there was weak evidence of a protective effect of serum calcium on prostate cancer risk (OR per 0.5 mg/dL increase in calcium: 0.83, 95% CI: 0.63-1.08;  $P=0.12$ ) (Table 2). Effect estimates were similar using the weighted median estimator (OR 0.80, 95% CI: 0.58-1.12) and MR-Egger (OR 0.87, 95% CI: 0.46-1.64). The MR-Egger intercept parameter did not suggest evidence of directional pleiotropy (OR 1.00,  $P=0.76$ ).

### *Advanced prostate cancer*

MR analyses found little evidence for an effect of serum calcium on advanced prostate cancer risk (0.5 mg/dL calcium increase: OR 0.98, 95% CI: 0.57-1.70;  $P=0.93$ ) (Table 2). Sensitivity analyses to examine directional pleiotropy were consistent with a null effect of serum calcium on advanced prostate cancer.

235

236 Calculation of the  $I^2_{GX}$  statistic suggested little attenuation of our MR-Egger estimates  
 237 due to measurement error for both overall prostate cancer ( $I^2_{GX}=0.89$ ) and advanced prostate  
 238 cancer ( $I^2_{GX}=0.91$ ), so adjustment of MR-Egger estimates to account for mild dilution bias  
 239 was not performed [52]. Leave-one-out permutation analyses for overall and advanced  
 240 prostate cancer did not find evidence that the effect estimate based on the multi-allelic  
 241 instrument was being driven by any single serum calcium related SNP (Supplementary Table  
 242 1).

243

## 244 Discussion

245 Our Mendelian randomization analysis does not support the hypothesis that serum  
 246 calcium increases the risk of overall or advanced prostate cancer. Indeed, the point estimates  
 247 were in the opposite direction (though imprecisely estimated) to findings from some  
 248 observational studies.

249 Our findings are not consistent with some laboratory studies which have reported a  
 250 role of calcium in promoting loss of differentiation and increased proliferation of prostate  
 251 cancer cells [54, 55]. Further, our results are not consistent with a meta-analysis of  
 252 prospective observational studies that reported dose-response relationships of dietary calcium  
 253 intake (per 400 mg/day) with risk of prostate cancer (RR 1.05, 95% CI: 1.02-1.09, N=15  
 254 studies), though there was moderate heterogeneity in associations across studies ( $I^2 = 49\%$ ,  $P$ -  
 255 heterogeneity = 0.02) [11].

256 Prospective studies that have examined the association of serum calcium with incident  
 257 prostate cancer have generated conflicting findings: three did not find strong evidence for an  
 258 association (HR for upper vs. lower tertile: 1.31, 95% CI: 0.77-2.20 [23]; OR for upper vs.

lower quartile: 1.04, 95% CI: 0.78–1.39 [28]; HR per quartile increase: 0.99, 95% CI: 0.94–1.03 [29]), whereas one reported a weak inverse association between calcium and prostate cancer (HR per SD increase: 0.97, 95% CI: 0.85–1.00) [24]. Likewise, some studies that have examined an association between serum calcium and fatal prostate cancer have reported positive risk relationships (HR for upper vs. lower tertile: 2.07, 95% CI: 1.06–4.04 [27]; HR for upper vs. lower tertile: 2.68, 95% CI: 1.02–6.99 [23]; HR per 0.1 mmol/L increase: 1.50, 95% CI: 1.04–2.17 [26]) whereas others have not found strong evidence of an association (HR per 1-SD increase: 1.00, 95% CI: 0.92–1.09 [24]; HR for upper vs. lower quartile: 0.75, 95% CI: 0.49–1.15 [25]). It is plausible that discordance between previously reported observational findings and our MR analysis may reflect residual confounding in the former (e.g., through other dietary, lifestyle, or molecular factors). Nevertheless, the weak evidence that we found for a potential protective effect of serum calcium on overall prostate cancer is consistent with a meta-analysis of four randomized controlled trials that reported that daily calcium supplementation ( $\geq 500$  mg/day) reduced prostate cancer risk (RR [Risk Ratio] 0.54, 95% CI: 0.30–0.96,  $P=0.03$ ), though this analysis was only based on 48 men with prostate cancer (3297 and 3248 in the intervention and control groups, respectively) [56].

Strengths of our analysis include the use of a Mendelian randomization approach to appraise the relationship of serum calcium with prostate cancer risk which should help to minimize or avoid confounding through lifestyle or environmental factors that may have biased findings from previous observational analyses. Further, given the time required for nutritional biomarkers to influence carcinogenesis [57] and the considerable latency period of prostate cancer [58], the use of germline genetic variation as an instrument should allow for sufficient time to confer an effect on prostate cancer. This is because MR will estimate the effect of life-long exposure to elevated serum calcium on prostate cancer risk. MR will also offer an additional strength over prospective studies of dietary or serum calcium which can

suffer from substantial (albeit, likely non-differential) measurement error: measurement error in genetic studies is often low as modern genotyping technologies provide relatively precise measurement of genetic variants [59]. The use of a two-sample MR approach allowed us to utilize summary effect estimates from two large GWAS and thus increase statistical power in our analyses. Additionally, though the F-statistic generated for our instrument suggested that weak instrument bias was unlikely, in a two-sample MR setting, weak instrument bias if present would be expected to bias associations toward the null, providing a conservative effect estimate. This is in contrast to a one-sample MR analysis in which weak instrument bias will tend to bias effect estimates toward the confounded observational study estimate [36]. Lastly, by obtaining summary effect estimates for both exposure and outcome datasets from GWAS that were restricted to individuals of European descent and adjusted for principal components of ancestry, we reduced (though did not eliminate) the possibility of confounding through population stratification in our MR analyses (though this may limit generalizability of our findings to other ethnicities).

There are limitations to our analysis. First, given the composite characterization of advanced prostate cancer in the summary GWAS data that we obtained (Gleason  $\geq 8$ , prostate-specific antigen  $>100$  ng/mL, metastatic disease (M1), or death from prostate cancer), it is difficult to directly compare our findings with those from prospective studies that examined associations between calcium and fatal prostate cancer. Second, though our MR analysis for advanced prostate cancer was sufficiently powered to detect effect sizes compatible with those reported in the observational literature, it was not powered to detect effect sizes of a more modest magnitude. Further identification of independent genetic variants that influence serum calcium (increasing instrument strength further by explaining a larger proportion of the variance in serum calcium) in addition to larger GWAS of advanced prostate cancer will help to improve statistical power for future analyses. A final limitation of



309 our analysis was that we were unable to examine possible non-linear effects of serum calcium  
310 on prostate cancer using summarized genetic data, which have been proposed previously [8].

311         Given that our findings raise the possibility that serum calcium may be protective  
312 against prostate cancer, there is a need to follow-up these results in large and independent  
313 datasets. Further identification of additional independent genetic variants robustly associated  
314 with serum calcium will help to improve precision of future analyses.

315         In conclusion, our Mendelian randomization analysis does not support the hypothesis  
316 that serum calcium increases the risk of overall or advanced prostate cancer.

## **Acknowledgments:**

The authors' responsibilities were as follows—SJL and CB: conceived the study; JY, KB, RL, CB, and SL: planned the analyses; JY: conducted data analysis; JY, KB, RL: prepared the manuscript; CB, the PRACTICAL consortium, GDS, RMM, SL: critically revised the manuscript; and all authors: read and approved the final manuscript. None of the authors had any conflicts of interest to declare.

Table 1. Descriptive statistics of calcium SNPs and estimates of their causal effects on overall and advanced prostate cancer in PRACTICAL.

| SNP        | Chr | Gene(s)                         | EA | NEA | Overall<br>Prostate cancer<br>OR (95% CI) | P<br>value | Advanced<br>Prostate cancer<br>OR (95% CI) | P<br>value |
|------------|-----|---------------------------------|----|-----|-------------------------------------------|------------|--------------------------------------------|------------|
| rs17251221 | 3   | <i>CASR</i>                     | G  | A   | 0.84 (0.65-1.09)                          | 0.18       | 0.83 (0.51-1.35)                           | 0.45       |
| rs10491003 | 10  | <i>GATA3</i>                    | T  | C   | 0.56 (0.28-1.15)                          | 0.12       | 1.58 (0.42-5.93)                           | 0.50       |
| rs7481584  | 11  | <i>CARS</i>                     | G  | A   | 0.72 (0.37-1.40)                          | 0.33       | 1.21 (0.34-4.23)                           | 0.77       |
| rs7336933  | 13  | <i>DGKH;</i><br><i>KIAA0564</i> | G  | A   | 1.36 (0.68-2.70)                          | 0.39       | 1.60 (0.44-5.80)                           | 0.48       |
| rs1570669  | 20  | <i>CYP24A1</i>                  | G  | A   | 0.66 (0.35-1.25)                          | 0.20       | 1.01 (0.31-3.29)                           | 0.99       |

Chr: Chromosome, EA: Effect Allele, NEA: Non-Effect Allele, OR: Odds Ratio, 95% CI: 95% Confidence Interval. EA reflects the allele that increases serum calcium levels. OR (95% CI) represents the exponential increase in odds for each 0.5 mg/dL increase in serum calcium

Table 2. Mendelian randomization derived causal effects of a 0.5 mg/dL increase in serum calcium on overall and advanced prostate cancer using a multi-allelic instrument in PRACTICAL.

|                                                            | <b>Maximum<br/>likelihood<br/>estimate<br/>OR (95% CI)<sup>a</sup></b> | <b>Weighted median<br/>estimator<br/>OR (95% CI)</b> | <b>MR-Egger<br/>regression<br/>OR (95% CI)</b> | <b>MR-Egger<br/>regression<br/>intercept term<br/><i>P</i>-value</b> |
|------------------------------------------------------------|------------------------------------------------------------------------|------------------------------------------------------|------------------------------------------------|----------------------------------------------------------------------|
| <b>Overall prostate<br/>cancer (N=72,729)<sup>b</sup></b>  | 0.83 (0.63-1.08)                                                       | 0.80 (0.58-1.12)                                     | 0.87 (0.46-1.64)                               | 0.76                                                                 |
| <b>Advanced prostate<br/>cancer (N=33,498)<sup>c</sup></b> | 0.98 (0.57-1.70)                                                       | 0.92 (0.50-1.66)                                     | 0.72 (0.24-2.15)                               | 0.42                                                                 |

<sup>a</sup> Odds ratio [OR] (95% confidence interval, CI) represents the exponential increase in odds for each 0.5 mg/dL increase in serum calcium. <sup>b</sup> maximum likelihood estimate obtained using a fixed-effects model ( $I^2=0\%$ ,  $Qp=0.44$ ); <sup>c</sup> fixed-effects model ( $I^2=0\%$ ,  $Qp=0.80$ ).

## Citations

1. Global Burden of Disease Cancer Collaboration, et al., *The Global Burden of Cancer 2013*. JAMA Oncol, 2015. **1**(4): p. 505-27.
2. Gann, P.H., *Risk factors for prostate cancer*. Rev Urol, 2002. **4 Suppl 5**: p. S3-S10.
3. Center, M.M., et al., *International variation in prostate cancer incidence and mortality rates*. Eur Urol, 2012. **61**(6): p. 1079-92.
4. Wong, M.C., et al., *Global Incidence and Mortality for Prostate Cancer: Analysis of Temporal Patterns and Trends in 36 Countries*. Eur Urol, 2016. **70**(5): p. 862-874.
5. Haenszel, W. and M. Kurihara, *Studies of Japanese migrants. I. Mortality from cancer and other diseases among Japanese in the United States*. J Natl Cancer Inst, 1968. **40**(1): p. 43-68.
6. McCredie, M., Williams, S., Coates M., *Cancer mortality in East and Southeast Asian migrants to New South Wales, Australia, 1975-1995*. Br J Cancer, 1999. **79**(7-8): p. 1277-82.
7. Thomas, D., Karagas, M., *Migrant studies*, in *In Cancer Epidemiology and Prevention*, F.J.J. Schottenfeld D, Editor. 1996, Oxford University Press: New York. p. 236–254.
8. Butler, L.M., et al., *Calcium intake increases risk of prostate cancer among Singapore Chinese*. Cancer Res, 2010. **70**(12): p. 4941-8.
9. Gao, X., LaValley, M.P., Tucker, K.L., *Prospective studies of dairy product and calcium intakes and prostate cancer risk: a meta-analysis*. J Natl Cancer Inst, 2005. **97**(23): p. 1768-77.
10. Tseng, M., et al., *Dairy, calcium, and vitamin D intakes and prostate cancer risk in the National Health and Nutrition Examination Epidemiologic Follow-up Study cohort*. Am J Clin Nutr, 2005. **81**(5): p. 1147-54.

11. Aune, D., et al., *Dairy products, calcium, and prostate cancer risk: a systematic review and meta-analysis of cohort studies*. Am J Clin Nutr, 2015. **101**(1): p. 87-117.
12. Chan, J.M., et al., *Dairy products, calcium, phosphorous, vitamin D, and risk of prostate cancer (Sweden)*. Cancer Causes Control, 1998. **9**(6): p. 559-66.
13. Giovannucci, E., et al., *A prospective study of calcium intake and incident and fatal prostate cancer*. Cancer Epidemiol Biomarkers Prev, 2006. **15**(2): p. 203-10.
14. Giovannucci, E., et al., *Calcium and fructose intake in relation to risk of prostate cancer*. Cancer Res, 1998. **58**(3): p. 442-7.
15. Allen, N.E., et al., *Animal foods, protein, calcium and prostate cancer risk: the European Prospective Investigation into Cancer and Nutrition*. Br J Cancer, 2008. **98**(9): p. 1574-81.
16. Park, S.Y., et al., *Calcium, vitamin D, and dairy product intake and prostate cancer risk: the Multiethnic Cohort Study*. Am J Epidemiol, 2007. **166**(11): p. 1259-69.
17. Peacock, M., *Calcium metabolism in health and disease*. Clin J Am Soc Nephrol, 2010. **5 Suppl 1**: p. S23-30.
18. Schwartz, G.G., *Is serum calcium a biomarker of fatal prostate cancer?*. Future Oncology, 2009. **5**(5): p. 577-580.
19. Konety, B.R., et al., *The role of vitamin D in normal prostate growth and differentiation*. Cell Growth Differ, 1996. **7**(11): p. 1563-70.
20. Schwartz, G.G., et al., *1,25-Dihydroxy-16-ene-23-yne-vitamin D3 and prostate cancer cell proliferation in vivo*. Urology, 1995. **46**(3): p. 365-9.
21. Schwartz, G.G., et al., *1 alpha,25-Dihydroxyvitamin D (calcitriol) inhibits the invasiveness of human prostate cancer cells*. Cancer Epidemiol Biomarkers Prev, 1997. **6**(9): p. 727-32.

22. Giovannucci, E., *Dietary influences of 1,25(OH)<sub>2</sub> vitamin D in relation to prostate cancer: a hypothesis*. Cancer Causes Control, 1998. **9**(6): p. 567-82.
23. Skinner, H.G., Schwartz, G.G., *Serum calcium and incident and fatal prostate cancer in the National Health and Nutrition Examination Survey*. Cancer Epidemiol Biomarkers Prev, 2008. **17**(9): p. 2302-5.
24. Van Hemelrijck, M., et al., *Serum calcium and incident and fatal prostate cancer in the Swedish AMORIS study*. Cancer Causes Control, 2012. **23**(8): p. 1349-58.
25. Brandstedt, J., et al., *Vitamin D, PTH, and calcium in relation to survival following prostate cancer*. Cancer Causes Control, 2016. **27**(5): p. 669-77.
26. Schwartz, G.G., Skinner H.G., *A prospective study of total and ionized serum calcium and time to fatal prostate cancer*. Cancer Epidemiol Biomarkers Prev, 2012. **21**(10): p. 1768-73.
27. Skinner, H.G., Schwartz G.G., *A prospective study of total and ionized serum calcium and fatal prostate cancer*. Cancer Epidemiol Biomarkers Prev, 2009. **18**(2): p. 575-8.
28. Brandstedt, J., et al., *Vitamin D, PTH, and calcium and the risk of prostate cancer: a prospective nested case-control study*. Cancer Causes Control, 2012. **23**(8): p. 1377-85.
29. Halthur, C., et al., *Serum calcium and the risk of prostate cancer*. Cancer Causes Control, 2009. **20**(7): p. 1205-14.
30. Davey Smith, G., Ebrahim, S., *Epidemiology--is it time to call it a day?* Int J Epidemiol, 2001. **30**(1): p. 1-11.
31. Lawlor, D.A., et al., *Those confounded vitamins: what can we learn from the differences between observational versus randomised trial evidence?* Lancet, 2004. **363**(9422): p. 1724-7.

32. Davey Smith, G., Ebrahim, S., '*Mendelian randomization*': *can genetic epidemiology contribute to understanding environmental determinants of disease?* Int J Epidemiol, 2003. **32**(1): p. 1-22.
33. Yarmolinsky, J., et al., *Causal inference in cancer epidemiology: what is the role of Mendelian randomization?* bioRxiv, 2017. **223966**.
34. O'Seaghdha, C.M., et al., *Meta-analysis of genome-wide association studies identifies six new Loci for serum calcium concentrations.* PLoS Genet, 2013. **9**(9): p. e1003796.
35. Schumacher, F.R., et al. *Prostate cancer metaanalysis of more than 140,000 men identifies 63 novel prostate cancer susceptibility loci.* Nature Genetics. 2018. In Press
36. Pierce, B.L., Burgess S., *Efficient design for Mendelian randomization studies: subsample and 2-sample instrumental variable estimators.* Am J Epidemiol, 2013. **178**(7): p. 1177-84.
37. Amos, C.I., et al., *The OncoArray Consortium: A Network for Understanding the Genetic Architecture of Common Cancers.* Cancer Epidemiol Biomarkers Prev, 2017. **26**(1): p. 126-135.
38. 1000 Genomes Project Consortium, et al., *A global reference for human genetic variation.* Nature, 2015. **526**(7571): p. 68-74.
39. 1000 Genomes Project Consortium, et al., *A map of human genome variation from population-scale sequencing.* Nature, 2010. **467**(7319): p. 1061-73.
40. Hemani, G., et al., *MR-Base: a platform for systematic causal inference across the phenome using billions of genetic associations.* bioRxiv, 2016. **078972**.
41. Albanes, D., et al., *Serum insulin, glucose, indices of insulin resistance, and risk of prostate cancer.* J Natl Cancer Inst, 2009. **101**(18): p. 1272-9.



42. Gong, Z., et al., *Obesity, diabetes, and risk of prostate cancer: results from the prostate cancer prevention trial*. *Cancer Epidemiol Biomarkers Prev*, 2006. **15**(10): p. 1977-83.
43. Jess, T., et al., *Cancer risk in inflammatory bowel disease according to patient phenotype and treatment: a Danish population-based cohort study*. *Am J Gastroenterol*, 2013. **108**(12): p. 1869-76.
44. Kok, D.E., et al., *Blood lipid levels and prostate cancer risk; a cohort study*. *Prostate Cancer Prostatic Dis*, 2011. **14**(4): p. 340-5.
45. Shin, S.Y., et al., *An atlas of genetic influences on human blood metabolites*. *Nat Genet*, 2014. **46**(6): p. 543-550.
46. Burgess, S., Thompson, S.G., CRP CHD Genetics Collaboration, *Avoiding bias from weak instruments in Mendelian randomization studies*. *Int J Epidemiol*, 2011. **40**(3): p. 755-64.
47. Burgess, S., *Sample size and power calculations in Mendelian randomization with a single instrumental variable and a binary outcome*. *Int J Epidemiol*, 2014. **43**(3): p. 922-9.
48. Burgess, S., et al., *Using published data in Mendelian randomization: a blueprint for efficient identification of causal risk factors*. *Eur J Epidemiol*, 2015. **30**(7): p. 543-52.
49. Higgins, J.P., et al., *Measuring inconsistency in meta-analyses*. *BMJ*, 2003. **327**(7414): p. 557-60.
50. Bowden, J., Davey Smith, G., Burgess, S., *Mendelian randomization with invalid instruments: effect estimation and bias detection through Egger regression*. *Int J Epidemiol*, 2015. **44**(2): p. 512-25.

51. Bowden, J., et al., *Consistent Estimation in Mendelian Randomization with Some Invalid Instruments Using a Weighted Median Estimator*. Genet Epidemiol, 2016. **40**(4): p. 304-14.
52. Bowden, J., et al., *Assessing the suitability of summary data for two-sample Mendelian randomization analyses using MR-Egger regression: the role of the I<sup>2</sup> statistic*. Int J Epidemiol, 2016.
53. Pierce, B.L., Ahsan, H., Vanderweele, T.J., *Power and instrument strength requirements for Mendelian randomization studies using multiple genetic variants*. Int J Epidemiol, 2011. **40**(3): p. 740-52.
54. Liao, J., et al., *Extracellular calcium as a candidate mediator of prostate cancer skeletal metastasis*. Cancer Res, 2006. **66**(18): p. 9065-73.
55. Ritchie, C.K., et al., *Effects of the calciotropic peptides calcitonin and parathyroid hormone on prostate cancer growth and chemotaxis*. Prostate, 1997. **30**(3): p. 183-7.
56. Bristow, S.M., et al., *Calcium supplements and cancer risk: a meta-analysis of randomised controlled trials*. Br J Nutr, 2013. **110**(8): p. 1384-93.
57. Sanson-Fisher, R.W., et al., *Limitations of the randomized controlled trial in evaluating population-based health interventions*. Am J Prev Med, 2007. **33**(2): p. 155-61.
58. Etzioni, R., et al., *Asymptomatic incidence and duration of prostate cancer*. Am J Epidemiol, 1998. **148**(8): p. 775-85.
59. Schatzkin, A., et al., *Mendelian randomization: how it can--and cannot--help confirm causal relations between nutrition and cancer*. Cancer Prev Res (Phila), 2009. **2**(2): p. 104-13.
